# Supplementary material
Source: Springer Nature journal article supplement (https://www.springermedizin.de/resource/supplementary/12990_2007_93_MOESM4_ESM.pdf/9612552)

# Repeated administration of the opioids

## Analgesia time-course

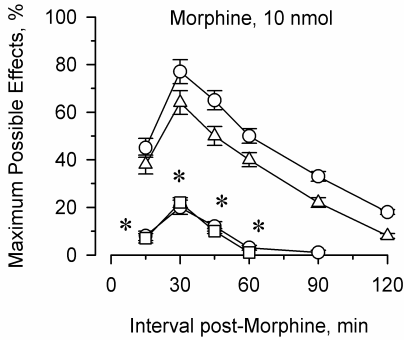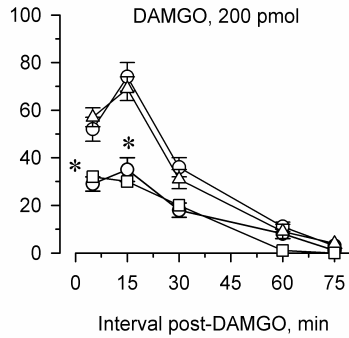

—○— First dose; —△— + 3h Second dose; —○— + 6h Third dose; —□— + 24h Fourth dose

### IP: MOR

Membrane      Internalized

MOR levels

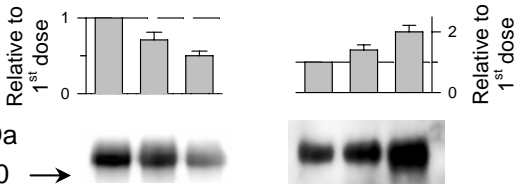

MOR P-Ser375

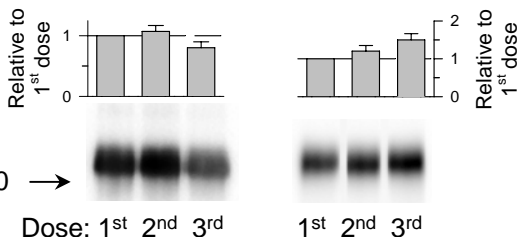

Sampled 3 h after each dose

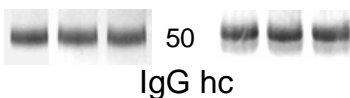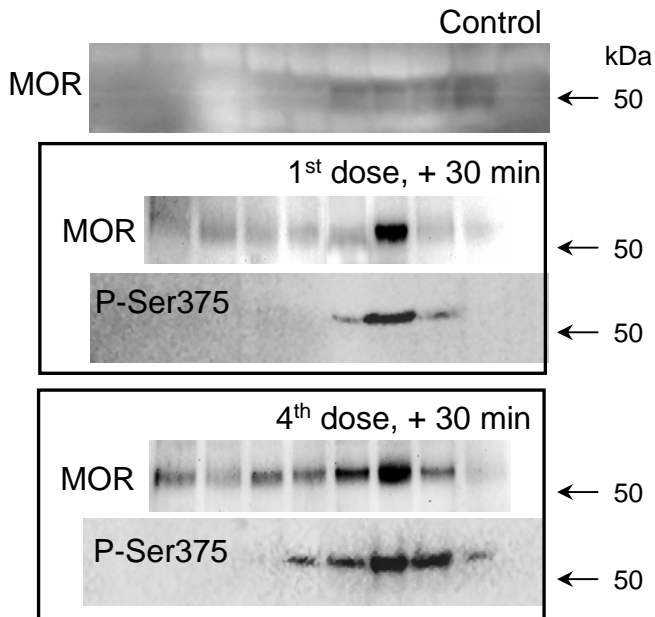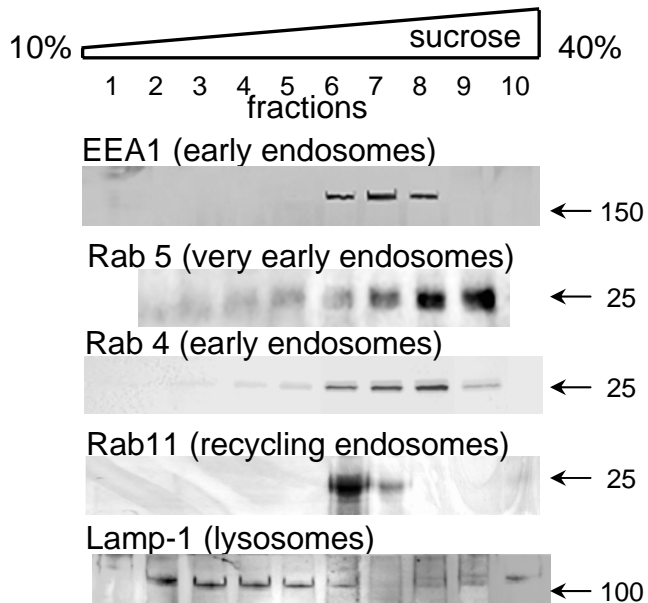

Supplement: MOESM4 [file 9612552]
